# Supplementary material for: Bioactive Compounds, Nutritional Quality and Antioxidant Capacity of the Red-Fleshed Kirkwood Navel and Ruby Valencia Oranges
Source: MDPI journal article supplement (doi:10.3390/antiox11101905), 2022-09-26
Supplement: s1 [file s1]

**Table S3.** Carotenoid content and composition ( $\mu\text{g/g}$  FW) in the pulp of Navel and Kirkwood fruits harvested in December and January. ND: non detected.

| Carotenoids            | Navel           |                 | Kirkwood         |                  |
|------------------------|-----------------|-----------------|------------------|------------------|
|                        | December        | January         | December         | January          |
| Phytoene               | $0.13 \pm 0.04$ | $0.35 \pm 0.04$ | $45.71 \pm 0.60$ | $56.91 \pm 0.76$ |
| Phytofluene            | $0.03 \pm 0.01$ | $0.07 \pm 0.01$ | $9.27 \pm 0.48$  | $11.15 \pm 1.58$ |
| $\zeta$ -carotene      | $0.02 \pm 0.01$ | $0.03 \pm 0.02$ | $0.20 \pm 0.08$  | $0.15 \pm 0.01$  |
| Neurosporene           | ND              | ND              | $0.31 \pm 0.06$  | $0.38 \pm 0.16$  |
| Lycopene               | ND              | ND              | $6.92 \pm 0.18$  | $8.83 \pm 0.53$  |
| $\delta$ -carotene     | ND              | ND              | $0.08 \pm 0.03$  | $0.10 \pm 0.01$  |
| Lutein                 | $0.22 \pm 0.04$ | $0.33 \pm 0.05$ | $0.20 \pm 0.10$  | $0.27 \pm 0.01$  |
| $\beta$ -carotene      | ND              | ND              | $0.20 \pm 0.02$  | $0.47 \pm 0.02$  |
| $\beta$ -cryptoxanthin | $0.23 \pm 0.05$ | $0.54 \pm 0.26$ | $0.31 \pm 0.06$  | $0.34 \pm 0.03$  |
| Zeaxanthin             | $0.09 \pm 0.02$ | $0.25 \pm 0.08$ | $0.17 \pm 0.06$  | $0.44 \pm 0.01$  |
| Anteraxanthin          | $0.47 \pm 0.02$ | $0.87 \pm 0.34$ | $0.12 \pm 0.01$  | $0.64 \pm 0.01$  |
| Violaxanthin           | $3.70 \pm 0.18$ | $3.55 \pm 1.34$ | $1.85 \pm 0.06$  | $2.05 \pm 0.20$  |
| Luteoxanthin           | $0.56 \pm 0.16$ | $0.92 \pm 0.19$ | $0.17 \pm 0.03$  | $0.21 \pm 0.03$  |
| Mutatoxanthin          | $0.03 \pm 0.01$ | $0.14 \pm 0.02$ | ND               | ND               |
| Total carotenoids      | $5.49 \pm 0.20$ | $7.10 \pm 1.96$ | $65.51 \pm 0.96$ | $81.94 \pm 0.86$ |
