# Supplementary material for: Bioactive Compounds, Nutritional Quality and Antioxidant Capacity of the Red-Fleshed Kirkwood Navel and Ruby Valencia Oranges
Source: MDPI journal article supplement (doi:10.3390/antiox11101905), 2022-09-26
Supplement: s1 [file s1]

**Table S2.** Pearson's correlation coefficients ( $r^2$ ) among vitamin C, tocopherols, total phenolics, total flavonoids, DPPH, FRAP, ABTS-H and ABT-L.

|        | VIT C | TOC   | TP    | TF    | DPPH  | FRAP   | ABTS-H | ABTS-L |
|--------|-------|-------|-------|-------|-------|--------|--------|--------|
| VIT C  | -     | 0.85* | 0.82* | 0.80* | 0.79* | 0.67*  | -0.14  | 0.72*  |
| TOC    | 0.85* | -     | 0.91* | 0.92* | 0.82* | 0.65*  | -0.07  | 0.85*  |
| TP     | 0.82* | 0.91* | -     | 0.97* | 0.86* | 0.65*  | -0.24  | 0.87*  |
| TF     | 0.80* | 0.91* | 0.97* | -     | 0.88* | 0.72*  | -0.28  | 0.86*  |
| DPPH   | 0.79* | 0.82* | 0.86* | 0.89* | -     | 0.85*  | -0.39  | 0.79*  |
| FRAP   | 0.67* | 0.65* | 0.65* | 0.72* | 0.85* | -      | -0.43* | 0.63*  |
| ABTS-H | -0.14 | -0.07 | -0.24 | -0.28 | -0.39 | -0.43* | -      | -0.02  |
| ABTS-L | 0.72* | 0.85* | 0.87* | 0.85* | 0.79* | 0.63*  | -0.02  | -      |

Asterisk indicates significant Pearson's correlation coefficient at level  $p \leq 0.05$ .
