# Supplementary material for: Bioactive Compounds, Nutritional Quality and Antioxidant Capacity of the Red-Fleshed Kirkwood Navel and Ruby Valencia Oranges
Source: MDPI journal article supplement (doi:10.3390/antiox11101905), 2022-09-26
Supplement: s1 [file s1]

**Table S4.** Carotenoid content and composition ( $\mu\text{g/g}$  FW) in the pulp of Valencia and Ruby fruits harvested in March and April. ND: non detected.

| Carotenoids            | Valencia        |                 | Ruby              |                   |
|------------------------|-----------------|-----------------|-------------------|-------------------|
|                        | March           | April           | March             | April             |
| Phytoene               | $0.57 \pm 0.01$ | $1.05 \pm 0.04$ | $103.66 \pm 6.27$ | $133.12 \pm 1.08$ |
| Phytofluene            | $0.15 \pm 0.01$ | $0.18 \pm 0.01$ | $17.82 \pm 0.15$  | $18.42 \pm 3.60$  |
| $\zeta$ -carotene      | $0.17 \pm 0.02$ | $0.29 \pm 0.02$ | $0.40 \pm 0.17$   | $0.62 \pm 0.13$   |
| Neurosporene           | ND              | ND              | $0.56 \pm 0.18$   | $0.33 \pm 0.02$   |
| Lycopene               | ND              | ND              | $8.15 \pm 1.30$   | $8.58 \pm 0.14$   |
| $\delta$ -carotene     | ND              | ND              | $0.17 \pm 0.10$   | $0.13 \pm 0.01$   |
| Lutein                 | $0.57 \pm 0.09$ | $0.61 \pm 0.08$ | $1.21 \pm 0.09$   | $0.32 \pm 0.05$   |
| $\beta$ -carotene      | traces          | traces          | $0.62 \pm 0.12$   | $0.41 \pm 0.03$   |
| $\beta$ -cryptoxanthin | $0.55 \pm 0.06$ | $0.58 \pm 0.16$ | $0.32 \pm 0.11$   | $0.30 \pm 0.10$   |
| Zeaxanthin             | $0.51 \pm 0.05$ | $0.66 \pm 0.15$ | $0.63 \pm 0.13$   | $0.61 \pm 0.02$   |
| Anteraxanthin          | $1.00 \pm 0.13$ | $1.20 \pm 0.12$ | $0.89 \pm 0.38$   | $0.98 \pm 0.26$   |
| Violaxanthin           | $2.53 \pm 0.79$ | $3.70 \pm 0.11$ | $1.54 \pm 0.98$   | $2.30 \pm 0.03$   |
| Luteoxanthin           | $1.02 \pm 0.20$ | $0.58 \pm 0.17$ | $0.23 \pm 0.04$   | $0.23 \pm 0.03$   |
| Mutatoxanthin          | $0.11 \pm 0.07$ | $0.18 \pm 0.13$ | $0.07 \pm 0.03$   | $0.10 \pm 0.01$   |
| Total carotenoids      | $8.18 \pm 0.84$ | $9.12 \pm 0.92$ | $135.33 \pm 5.05$ | $166.49 \pm 2.81$ |
